# Supplementary material for: The synergistic effect of inert oxide and metal fluoride dual coatings on advanced cathode materials for lithium ion battery applications
Source: Royal Society of Chemistry journal article supplement (doi:10.1039/c6cp02007k), 2016-01-01
Supplement: c6cp02007k1.pdf [file c6cp02007k1.pdf]

### Supplementary Information

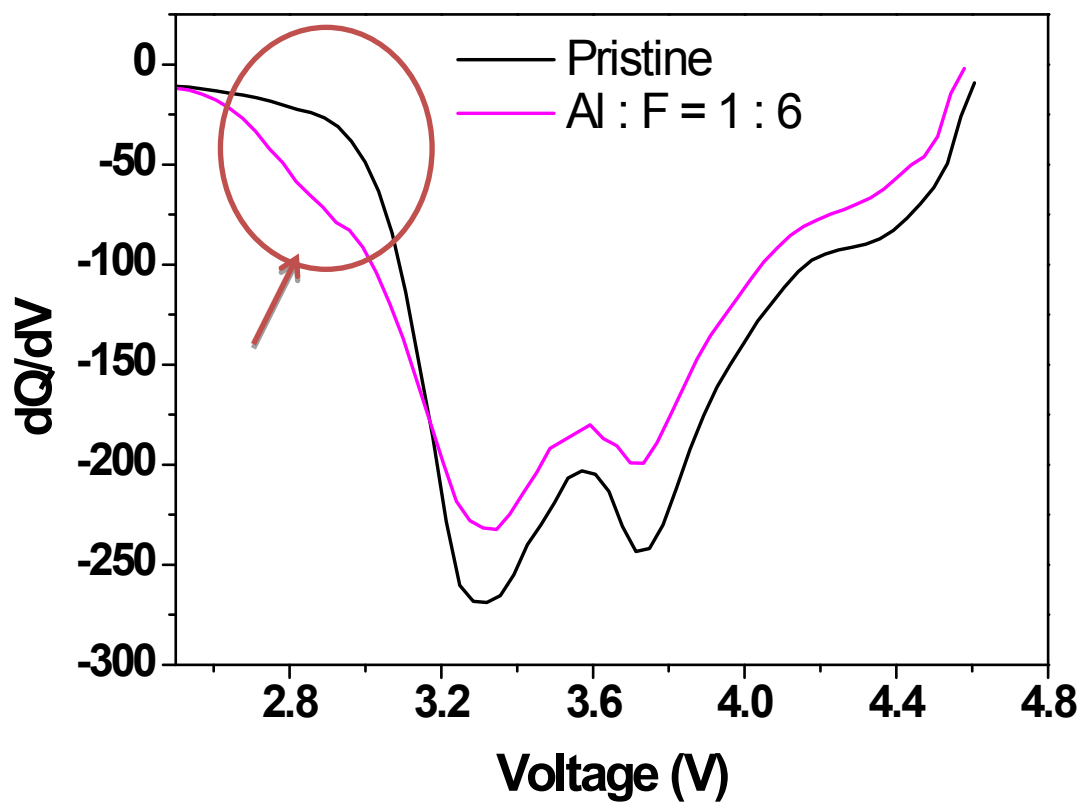

S1. (a) Comparison of  $dQ/dV$  versus voltage of pristine sample and dual coated OLO sample with an  $Al_2O_3/LiF$  ratio of 1:6.
